# Supplementary material for: Technical note: Emission mapping of key sectors in Ho Chi Minh City, Vietnam, using satellite-derived urban land use data
Source: Copernicus journal article supplement (doi:10.5194/acp-21-2795-2021), 2021-02-24
Supplement: Supplementary file 1 [file acp-21-2795-2021-supplement.pdf]

Supplement of Atmos. Chem. Phys., 21, 2795–2818, 2021  
<https://doi.org/10.5194/acp-21-2795-2021-supplement>  
© Author(s) 2021. This work is distributed under  
the Creative Commons Attribution 4.0 License.

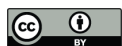

*Supplement of*

## **Technical note: Emission mapping of key sectors in Ho Chi Minh City, Vietnam, using satellite-derived urban land use data**

**Trang Thi Quynh Nguyen et al.**

*Correspondence to:* Trang Thi Quynh Nguyen (ntqtrang@sti.vast.vn)

The copyright of individual parts of the supplement might differ from the CC BY 4.0 License.

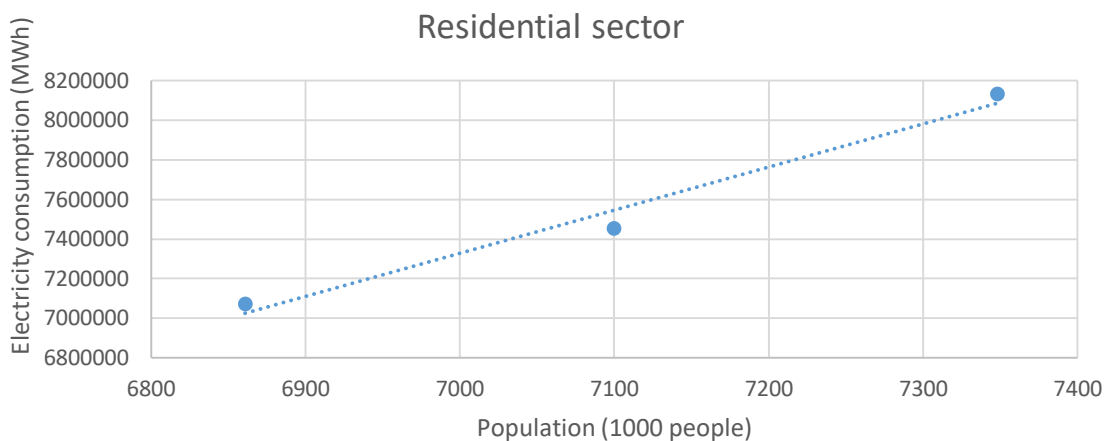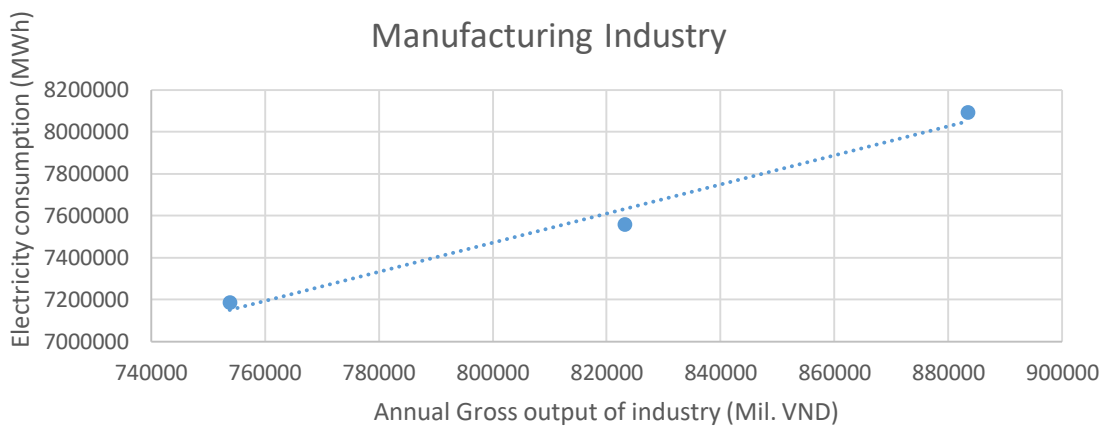

5 **Figure S1. Correlations between electricity consumptions of Residential sector with Annual population in HCM and electricity consumptions of Manufacturing industry sector with Annual gross output of industry in HCM.**

**Table S1. Description about REAS v2.1 inventory (J. Kurokawa et al., 2013)**

|                     |                                                                                                                                                                         |
|---------------------|-------------------------------------------------------------------------------------------------------------------------------------------------------------------------|
| Spatial resolution  | 0.25 deg                                                                                                                                                                |
| Temporal resolution | Monthly                                                                                                                                                                 |
| Time domain         | 2000-2008                                                                                                                                                               |
| Species             | SO <sub>2</sub> , NO <sub>x</sub> , CO, NMVOC, PM <sub>10</sub> , PM <sub>2.5</sub> , BC, OC, NH <sub>3</sub> , CH <sub>4</sub> , N <sub>2</sub> O, and CO <sub>2</sub> |
| Coverage            | East, Southeast, South, and Central Asia. Asian part of Russia (Far East, Eastern and Western Siberia, and Ural)                                                        |

|         |                                                                                                                                                                                                                           |
|---------|---------------------------------------------------------------------------------------------------------------------------------------------------------------------------------------------------------------------------|
| Sectors | Stationary combustion and industrial processes, road transport, Agricultural activities, Other sources.<br>Power plant, industry, road transport, aviation, International navigation, other transport, domestic and other |
|---------|---------------------------------------------------------------------------------------------------------------------------------------------------------------------------------------------------------------------------|

**Table S2. Data sources used in REAS2.1 for Transportation, Industry and Domestic sectors (J. Kurokawa et al, 2013)**

| Sector             | Transportation                                                                                                                                                                                                                              | Industry and Domestic                                                                                                                                                                                                                                                                                                                                                                          |
|--------------------|---------------------------------------------------------------------------------------------------------------------------------------------------------------------------------------------------------------------------------------------|------------------------------------------------------------------------------------------------------------------------------------------------------------------------------------------------------------------------------------------------------------------------------------------------------------------------------------------------------------------------------------------------|
| Activity data      | Vehicle numbers, annual distance traveled.<br>Vehicle numbers were from the World Road Statistics (IRF, 2006–2010) and then subdivided into vehicle types by using the national and sub-regional statistics and database of the GAINS model | Fuel consumption or amount of industrial product (for industrial process emissions).<br>Energy consumption data for each fuel type including biofuels and sector categories were taken from the International Energy Agency (IEA) Energy Balances database.<br>Activity data for sources other than energy came from a variety of international, national, and regional statistics and studies |
| Spatial allocation | Road network                                                                                                                                                                                                                                | Spatial distribution of rural, urban, and total populations.                                                                                                                                                                                                                                                                                                                                   |
